# Supplementary material
Source: Springer Nature journal article supplement (https://www.springermedizin.de/resource/supplementary/12874_2011_693_MOESM3_ESM.pdf/9432400)

$q_1 = 0.05, s = 0.20, r = 0.61$

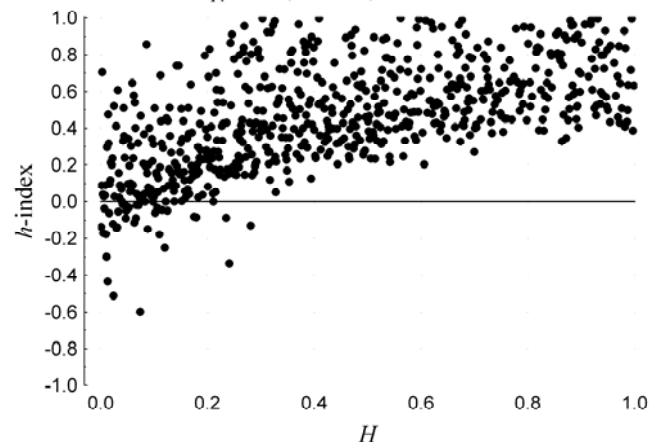

$q_1 = 0.10, s = 0.20, r = 0.68$

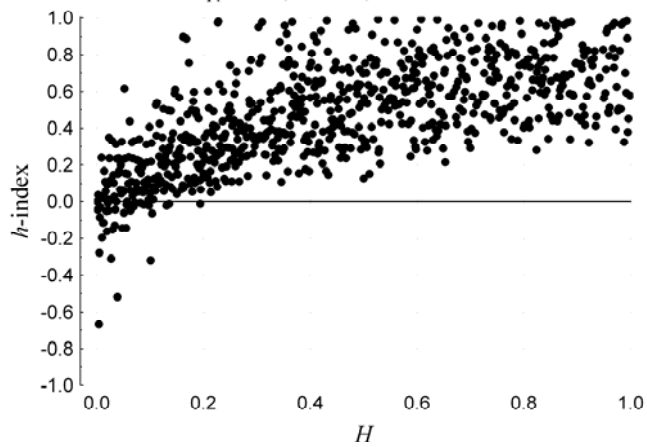

$q_1 = 0.20, s = 0.20, r = 0.85$

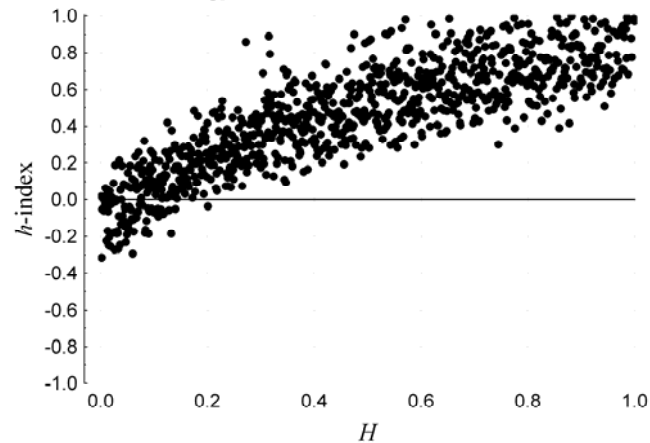

$q_1 = 0.40, s = 0.20, r = 0.90$

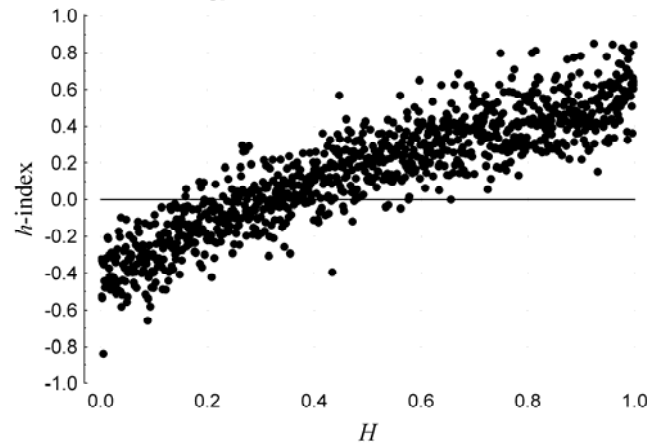

$q_1 = 0.05, s = 0.50, r = 0.71$

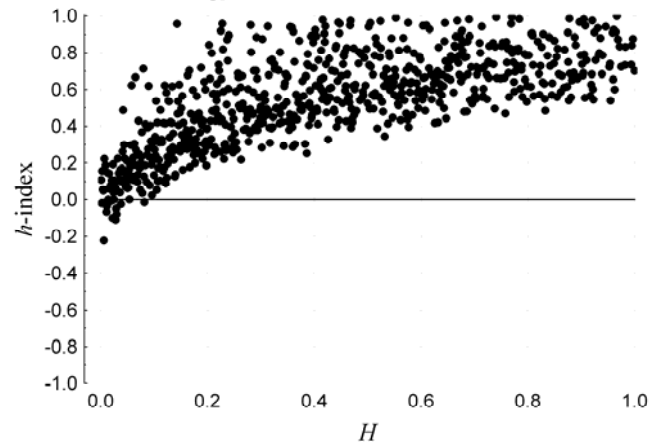

$q_1 = 0.10, s = 0.50, r = 0.89$

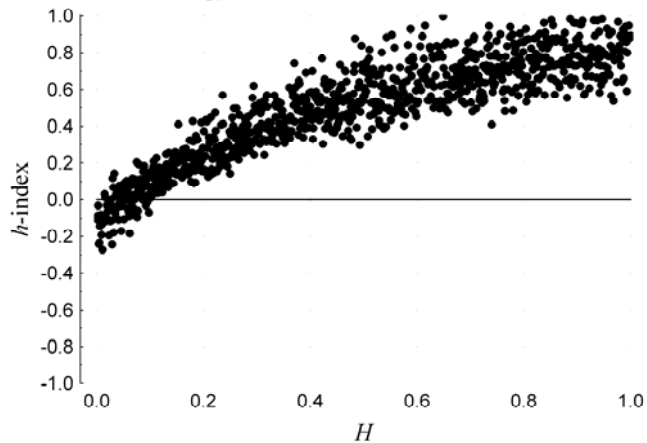

$q_1 = 0.20, s = 0.50, r = 0.89$

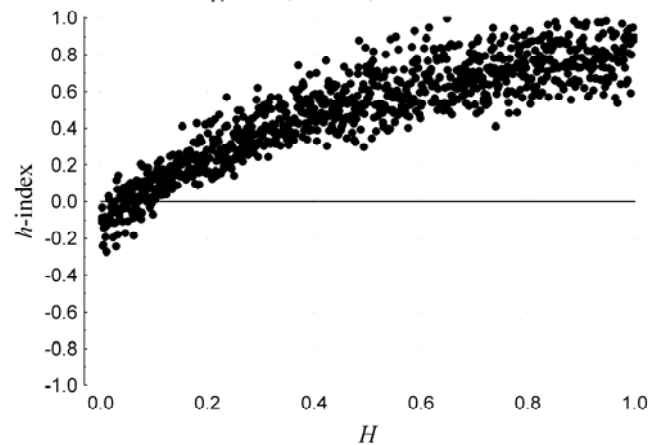

$q_1 = 0.40, s = 0.50, r = 0.93$

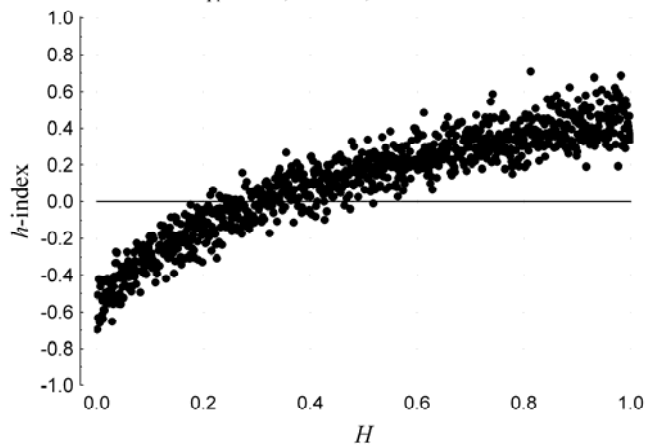

Supplement: MOESM3 [file 9432400]
